# Supplementary material
Source: ML conference proceedings conference paper supplement (https://aclanthology.org/2026.semeval-1.128)
Supplement: SupplementaryMaterial [file figure1.pdf › figure/figure1.pdf]

# Conspiracy Detection Example

Input: "This is relevant to Superstonk because Boston Consulting Group is bringing Gamestop to court in Delaware, and there is cause for concern that this trial may have corrupt judges involved."

It clearly bears the elements of a conspiracy!

Answer: **Yes!**

Input: "They start off lying on the ground with very long, heavy stilts tied to their legs, and somehow need to help each other up. The way they do it is really clever..."

It is merely a statement, without any conspiracy theory elements

Answer: **No!**
