# Supplementary material
Source: ML conference proceedings conference paper supplement (https://aclanthology.org/2026.semeval-1.128)
Supplement: SupplementaryMaterial [file figure2.pdf › figure/figure2.pdf]

# ①Data Processing

Input: "They start off lying on the ground with very long, heavy stilts tied to their legs, and somehow need to help each other up. The way they do it is really clever..."

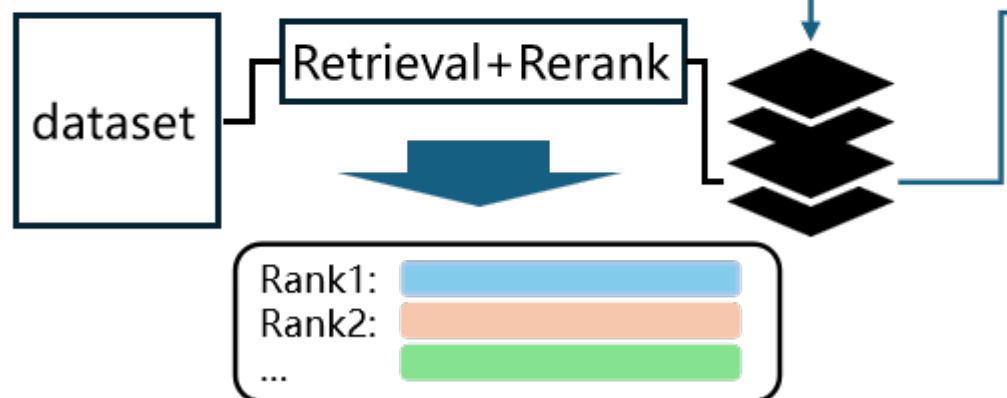

# ②PLMs Processing

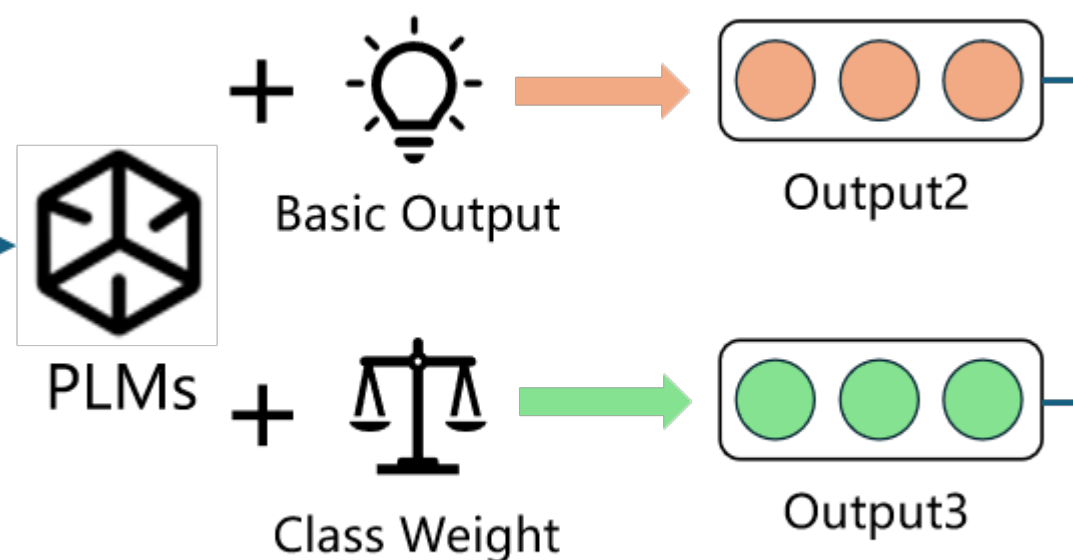

# ③LLMs Processing

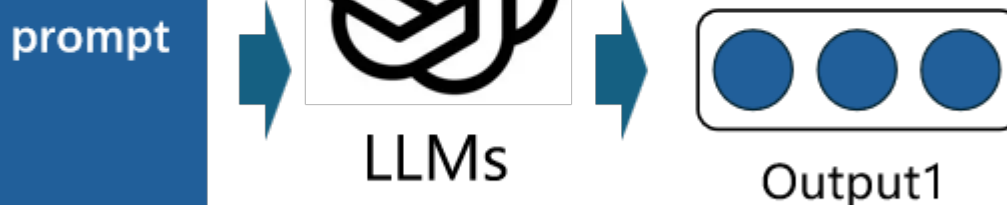

# Ensemble Learning

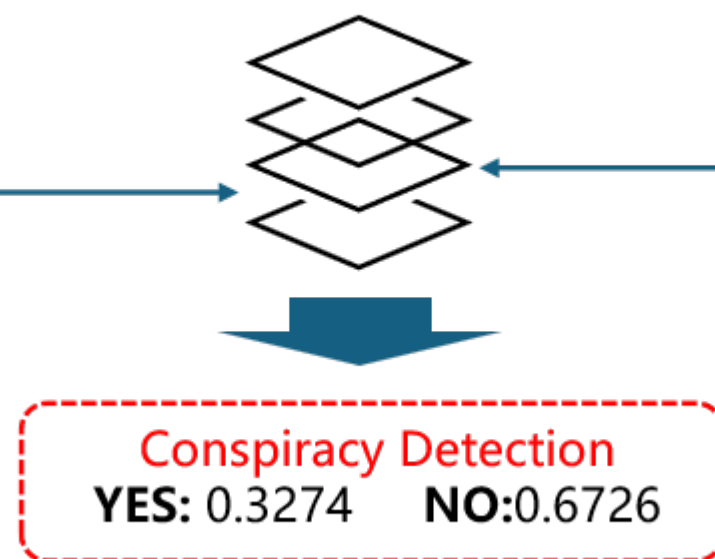

# ④Model Ensembling
